# Supplementary material for: Single nanowire on graphene (SNOG) as an efficient, reproducible, and stable SERS-active platform
Source: Royal Society of Chemistry journal article supplement (doi:10.1039/c6nr00092d), 2016-01-01
Supplement: c6nr00092d1.pdf [file c6nr00092d1.pdf]

## Supplementary information

# Single Nanowire on Graphene (SNOG) as an Efficient, Reproducible, and Stable SERS-Active Platform

*Hongki Kim,<sup>‡a</sup> Myeong-Lok Seol,<sup>‡b</sup> Dong-Il Lee,<sup>b</sup> Jiyoung Lee,<sup>a</sup> Il-Suk Kang,<sup>c</sup> Hyoban Lee,<sup>a</sup>  
Taejoon Kang,<sup>\*d,e</sup> Yang-Kyu Choi,<sup>\*b</sup> and Bongsoo Kim<sup>\*a</sup>*

<sup>a</sup>Department of Chemistry, KAIST, 291 Daehak-ro, Yuseong-gu, Daejeon 34141, Republic of Korea, <sup>b</sup>Department of Electrical Engineering, KAIST, 291 Daehak-ro, Yuseong-gu, Daejeon 34141, Republic of Korea, <sup>c</sup>National Nanofab Center, KAIST, Daejeon 34141, Republic of Korea, <sup>d</sup>Hazard Monitoring BNT Research Center and BioNano Health Guard Research Center, KRIBB, 125 Gwahak-ro, Yuseong-gu, Daejeon 34141, Republic of Korea, <sup>e</sup>Major of Nanobiotechnology and Bioinformatics, UST, 217 Gajeong-ro, Yuseong-gu, Daejeon 34113, Republic of Korea.

Corresponding Author

\*E-mail: bongsoo@kaist.ac.kr (B.K.); ykchoi@ee.kaist.ac.kr (Y.-K.C.);

kangtaejoon@kribb.re.kr (T.K.)

Author Contribution

<sup>‡</sup>These authors contributed equally to this work.

## Supplementary information M1:

### Enhancement Factor of SNOG Platform

To calculate the enhancement factor (EF) of SNOG platform with Ag and Au film, we measured SERS spectra of Cu-phthalocyanine (CuPc) from pristine glass, SNOG with Ag film, and SNOG with Au film, respectively. Figure S1 shows surface-enhanced Raman scattering (SERS) spectra of CuPc measured from glass (black), SNOG with Ag (red) and Au film (blue). We estimated EF of SNOG platforms using the expression of  $EF = (I_{SERS}/I_{Ref}) \times (N_{Ref}/N_{SERS})$ .  $I_{SERS}$  is the intensity of  $1,531\text{ cm}^{-1}$  CuPc band on SNOG platforms and  $I_{Ref}$  is the intensity of  $1,531\text{ cm}^{-1}$  CuPc band on a glass.  $N_{SERS}$  is the number of CuPc contributing to  $I_{SERS}$  and  $N_{Ref}$  is the number of CuPc contributing to  $I_{Ref}$ . Assuming uniform adsorption of CuPc, the expression can be changed to  $EF = (I_{SERS}/I_{Ref}) \times (A_{Ref}/A_{SERS})$ .  $A_{SERS}$  indicates the surface area of SERS-active region in SNOG platforms and  $A_{Ref}$  is the laser-illuminated area of a glass. The diameter of NW is about 180 nm and the diameter of laser spot is 500 nm.  $A_{SERS}$  is calculated to be  $1.41 \times 10^4\text{ nm}^2$  considering the shape of NW and  $A_{Ref}$  is  $7.85 \times 10^5\text{ nm}^2$ . Therefore, the EF of SNOG platform with Ag and Au film was calculated to be  $1.90 \times 10^6$  and  $1.18 \times 10^6$ , respectively. In addition, the EF of Au NW on Au film was calculated to be  $7.36 \times 10^5$  based on Fig. 2a.

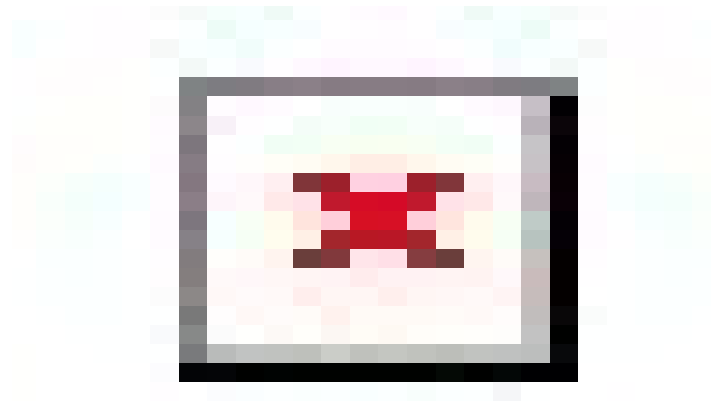

**Fig. S1.** SERS spectra of CuPc measured from SNOG platform with Ag film (red) and Au film (blue), and pristine glass (black). Spectrum from pristine glass is 100 times magnified in the vertical scale. The asterisk-marked peaks denote G and 2D bands of graphene.

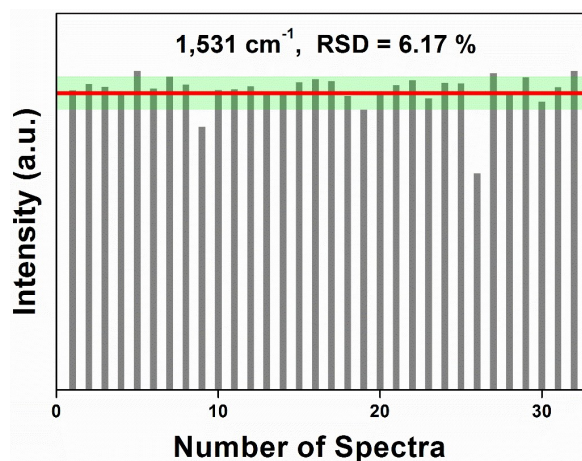

**Fig. S2.** Intensity distribution of  $1,531\text{ cm}^{-1}$  band of CuPc measured from 32 different SNOG platforms. The RSD was calculated to be 6.17 % of the average intensity.

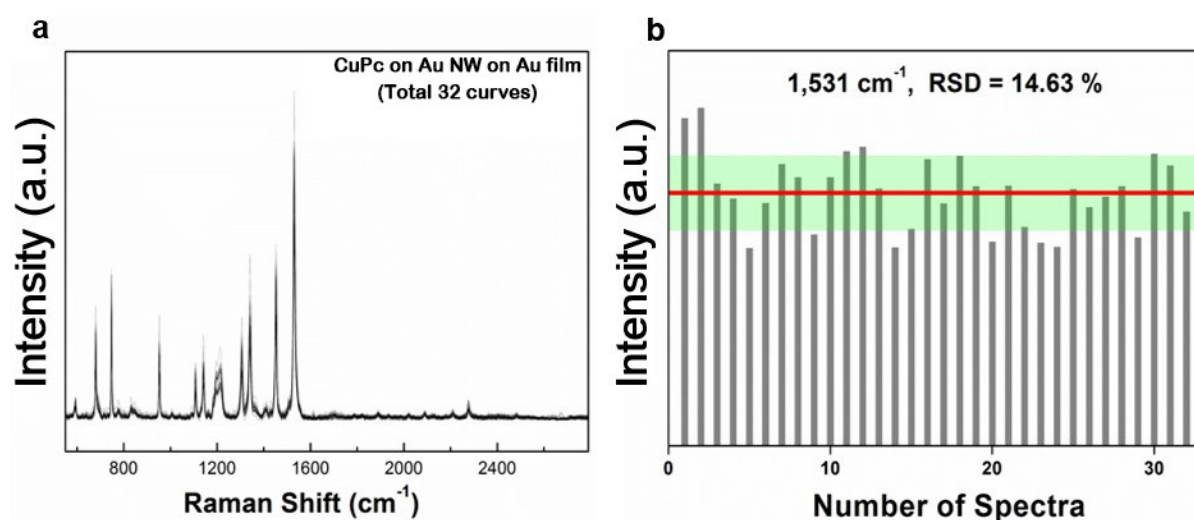

**Fig. S3.** (a) Overlapped SERS spectra of CuPc from 32 randomly selected Au NW on Au film structures. (b) Intensity distribution of  $1,531\text{ cm}^{-1}$  band of CuPc measured from 32 different Au NW on Au film structures. The RSD was calculated to be 14.63 % of the average intensity.

**Fig. S4.** (a) Schematic illustration of Au NW on Ag film, Au NW on Au film, SNOG with Ag film, and SNOG with Au film. (b) Normalized 1,531  $\text{cm}^{-1}$  band intensities of CuPc measured from 4 different platforms for 320 s. The SERS intensities are normalized by the highest 1,531  $\text{cm}^{-1}$  band intensity. Compared to the NW-based SERS-active platforms without graphene, SNOG platforms show much improved photostability.
